# Supplementary material
Source: publisher site journal article supplement (https://www.dovepress.com/article/249827)
Supplement: Supplementary file 1 [file get_supplementary_file.php]

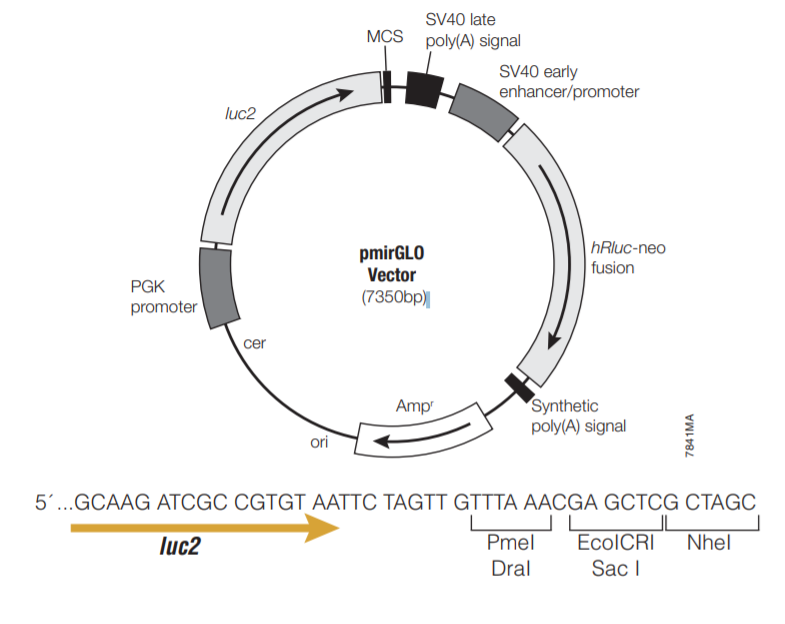


Figure S1: The illustration of luciferase vector construction,


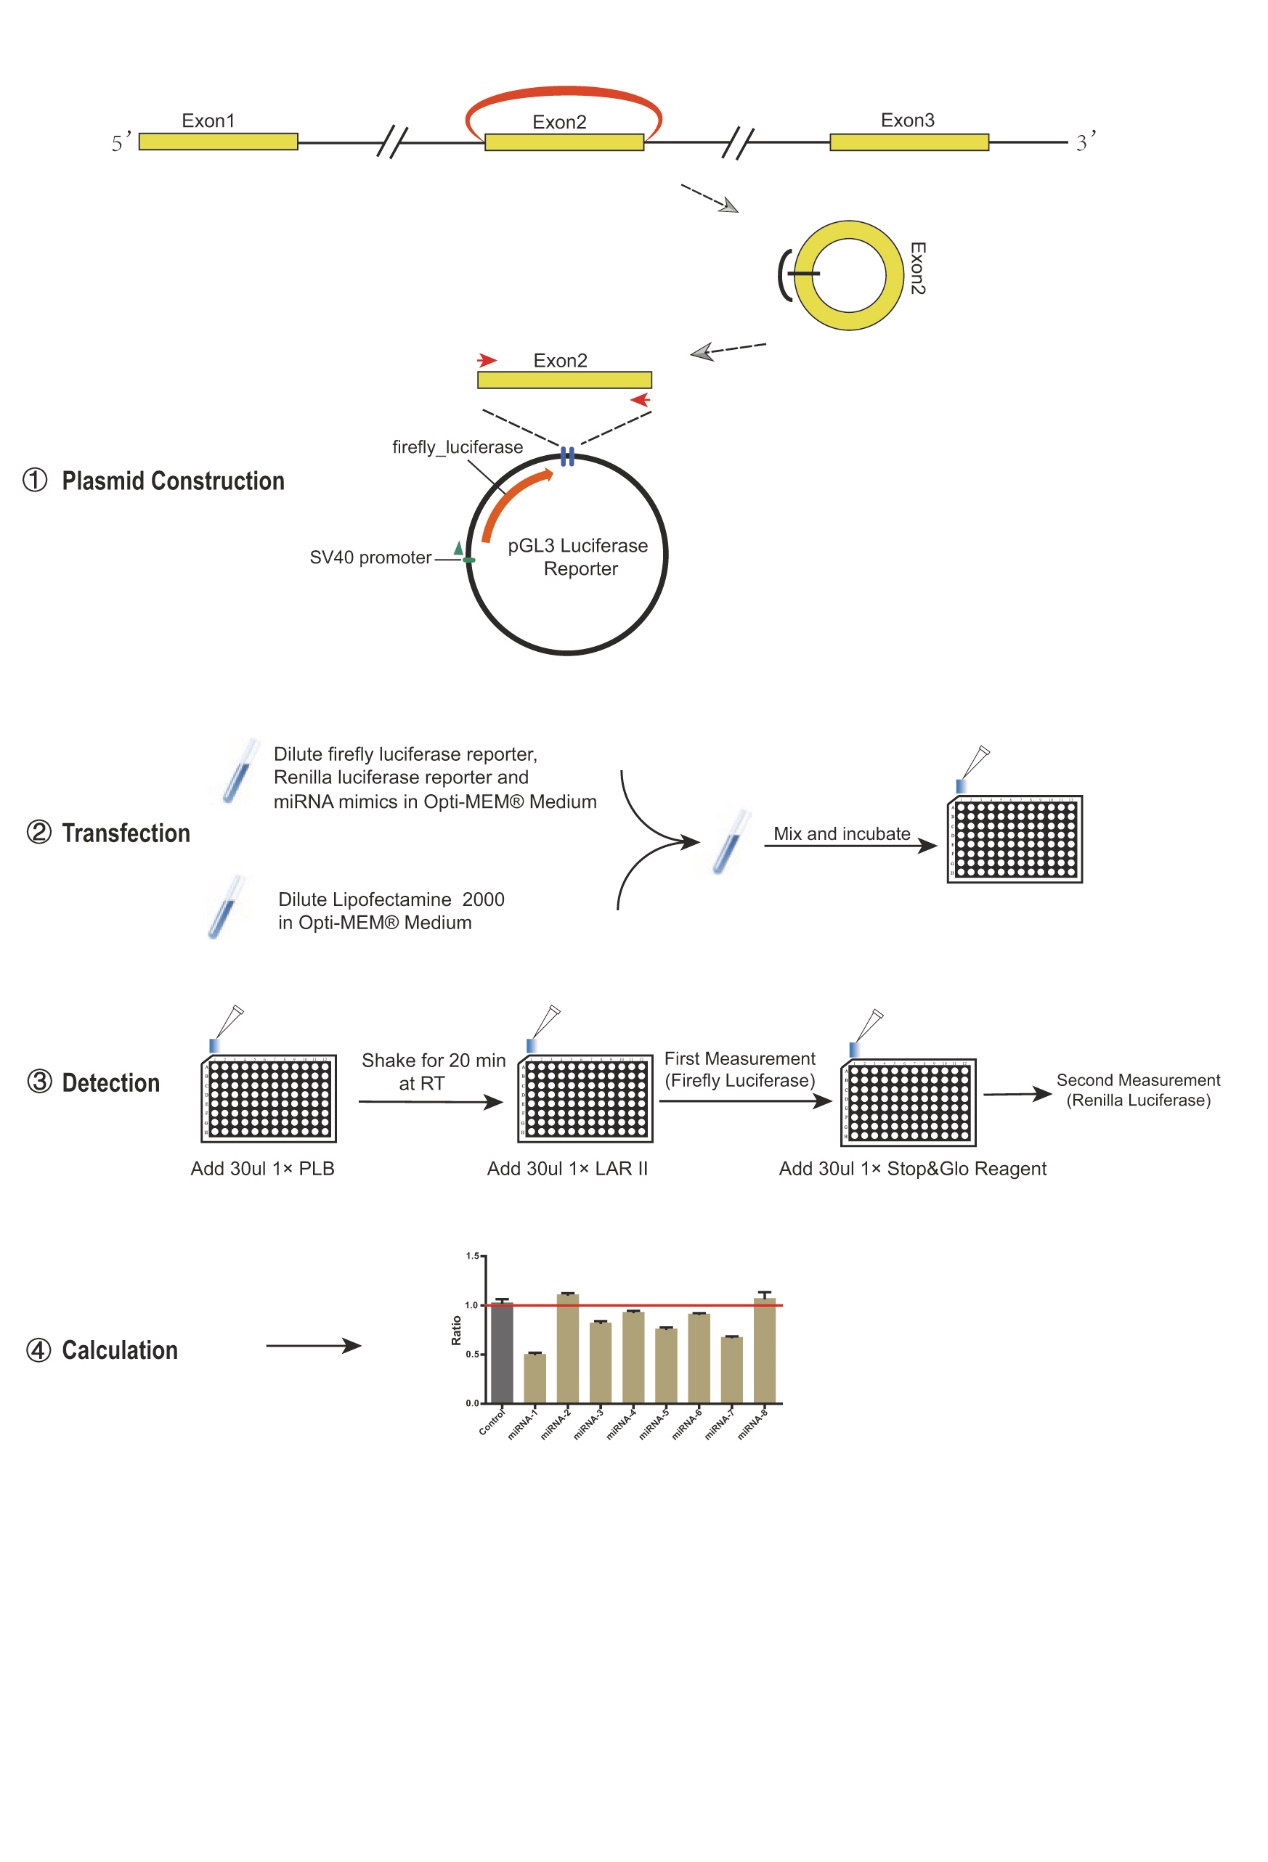


Figure S2: The schematic illustration of luciferase screening assay.


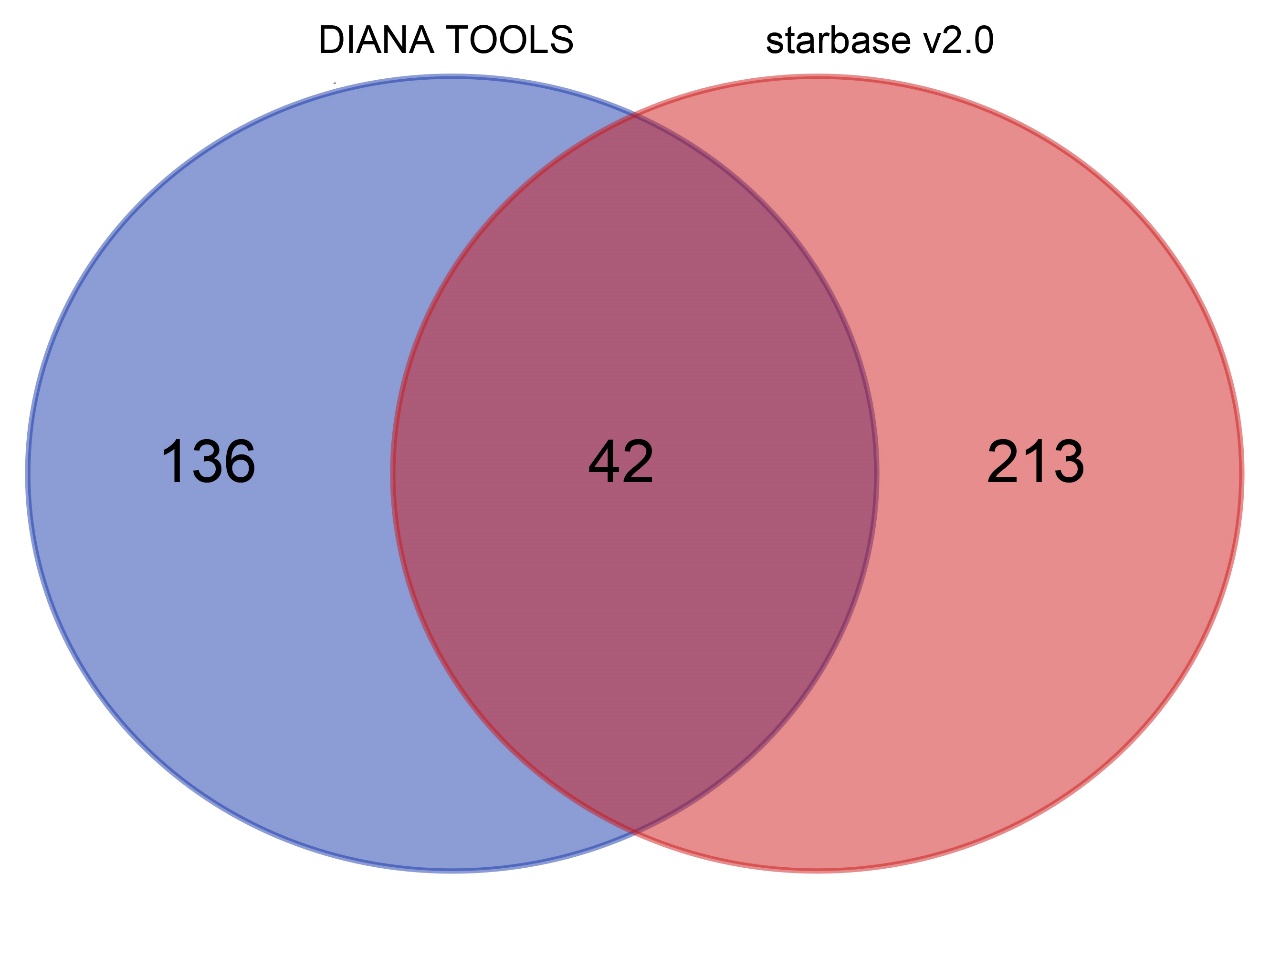


Figure S3: The Venn diagram of miRNAs predicted by two bioinformatics tools


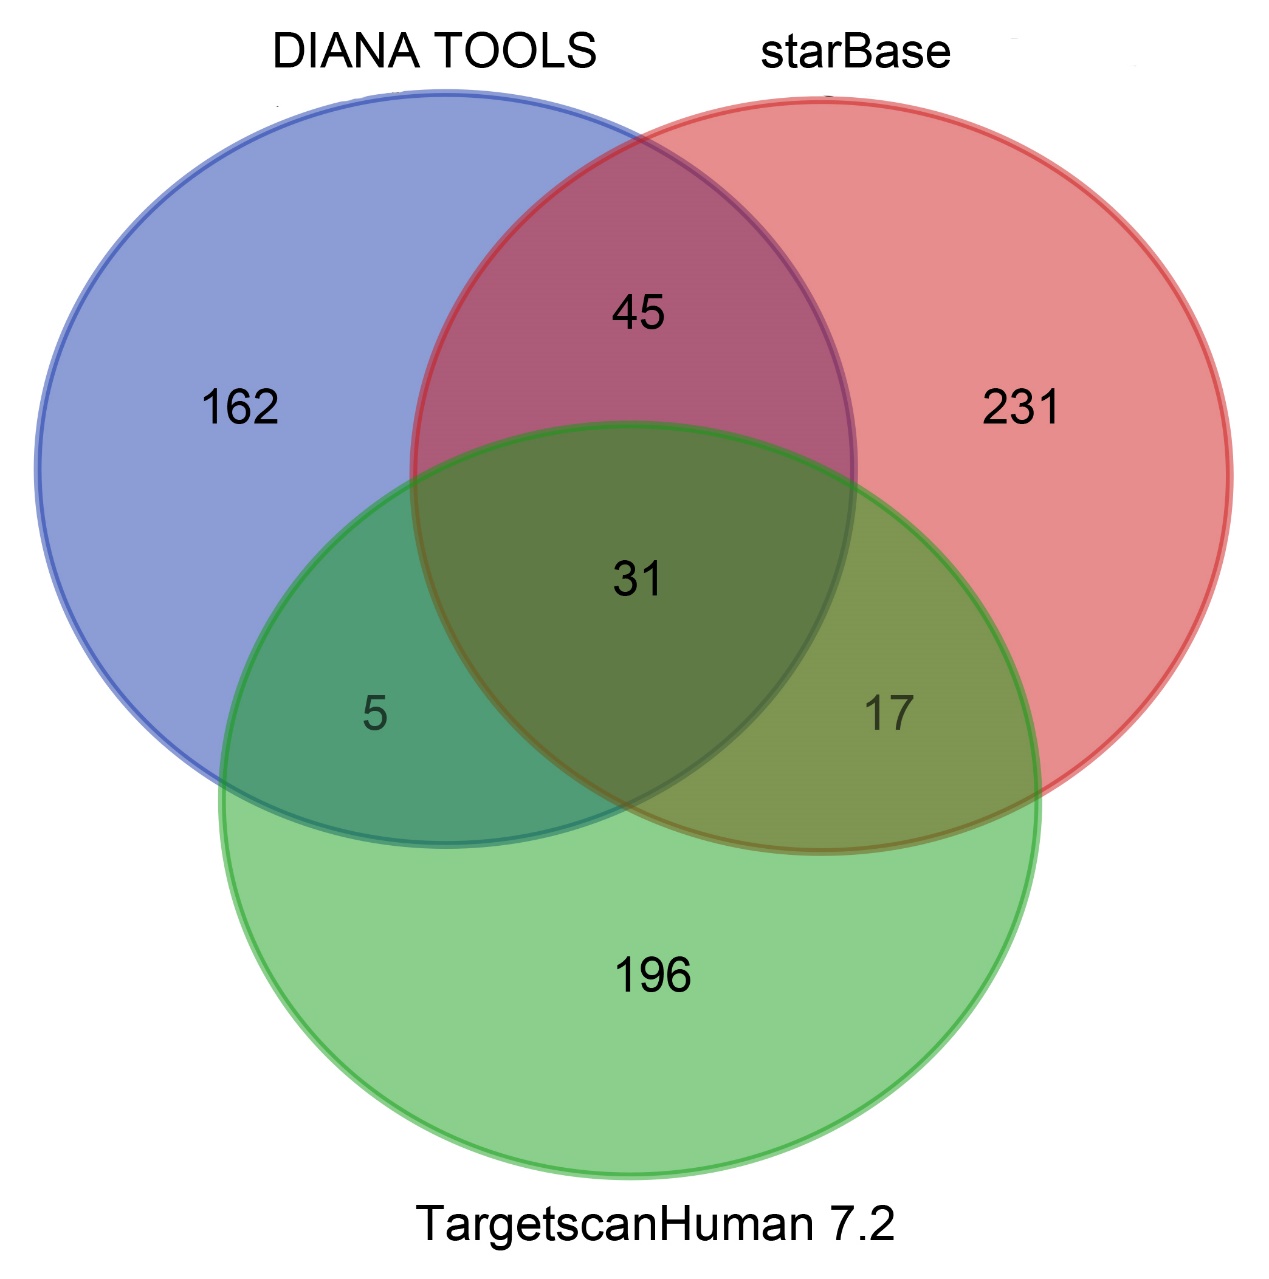


Figure S4: The Venn diagram of target genes predicted by three biominformatics tools.
